# Supplementary material for: High-efficiency red photoluminescence achieved by antimony doping in organic–inorganic halide (C11H24N2)2[InBr6][InBr4]
Source: Royal Society of Chemistry journal article supplement (doi:10.1039/d2tc00355d), 2022-01-01
Supplement: d2tc00355d1.pdf [file d2tc00355d1.pdf]

Supporting Information for:

# High Efficiency Red Photoluminescence Achieved by Antimony Doping in Organic-Inorganic Hybrid Halide (C<sub>11</sub>H<sub>24</sub>N<sub>2</sub>)<sub>2</sub>[InBr<sub>6</sub>][InBr<sub>4</sub>]

Jiawei Lin,<sup>a</sup> Zhongnan Guo,<sup>\*a</sup> Niu Sun,<sup>a</sup> Kunjie Liu,<sup>b</sup> Xin Chen,<sup>c</sup> Jing Zhao,<sup>b</sup> Quanlin Liu,<sup>b</sup> and Wenxia  
Yuan,<sup>\*a</sup>

<sup>a</sup> Department of Chemistry, School of Chemistry and Biological Engineering, University of Science and  
Technology Beijing, Beijing, 100083, China

<sup>b</sup> The Beijing Municipal Key Laboratory of New Energy Materials and Technologies, School of  
Materials Sciences and Engineering, University of Science and Technology Beijing, Beijing 100083,  
China

<sup>c</sup> Beijing Advanced Innovation Center for Materials Genome Engineering, Institute of Solid State  
Chemistry, University of Science and Technology Beijing, Beijing 100083, China

# CONTENTS

|                                                                                                                                                                                                                                                           |     |
|-----------------------------------------------------------------------------------------------------------------------------------------------------------------------------------------------------------------------------------------------------------|-----|
| <b>Table S1.</b> Crystal data and structure refinement of $(C_{11}H_{24}N_2)_2[InBr_6][InBr_4]$ at 300 K.                                                                                                                                                 | S4  |
| <b>Table S2.</b> Atomic coordinates ( $\times 10^4$ ) and equivalent isotropic displacement parameters ( $\text{\AA}^2 \times 10^3$ ) for $(C_{11}H_{24}N_2)_2[InBr_6][InBr_4]$ at 300 K with estimated standard deviations in parentheses.               | S5  |
| <b>Table S3.</b> Anisotropic displacement parameters ( $\text{\AA}^2 \times 10^3$ ) for $(C_{11}H_{24}N_2)_2[InBr_6][InBr_4]$ at 300 K with estimated standard deviations in parentheses.                                                                 | S6  |
| <b>Table S4.</b> Crystal data and structure refinement of $(C_{11}H_{24}N_2)_2[InBr_6][InBr_4]:xSb^{3+}$ ( $x = 0, 0.05$ and $0.10$ ) at 150 K.                                                                                                           | S8  |
| <b>Table S5.</b> Atomic coordinates ( $\times 10^4$ ) and equivalent isotropic displacement parameters ( $\text{\AA}^2 \times 10^3$ ) for $(C_{11}H_{24}N_2)_2[InBr_6][InBr_4]$ at 150 K with estimated standard deviations in parentheses.               | S9  |
| <b>Table S6.</b> Anisotropic displacement parameters ( $\text{\AA}^2 \times 10^3$ ) for $(C_{11}H_{24}N_2)_2[InBr_6][InBr_4]$ at 150 K with estimated standard deviations in parentheses.                                                                 | S10 |
| <b>Table S7.</b> Atomic coordinates ( $\times 10^4$ ) and equivalent isotropic displacement parameters ( $\text{\AA}^2 \times 10^3$ ) for $(C_{11}H_{24}N_2)_2[In_{0.9}Sb_{0.1}Br_6][InBr_4]$ at 150 K with estimated standard deviations in parentheses. | S11 |
| <b>Table S8.</b> Anisotropic displacement parameters ( $\text{\AA}^2 \times 10^3$ ) for $(C_{11}H_{24}N_2)_2[In_{0.9}Sb_{0.1}Br_6][InBr_4]$ at 150 K with estimated standard deviations in parentheses.                                                   | S13 |
| <b>Table S9.</b> Atomic coordinates ( $\times 10^4$ ) and equivalent isotropic displacement parameters ( $\text{\AA}^2 \times 10^3$ ) for $(C_{11}H_{24}N_2)_2[In_{0.8}Sb_{0.2}Br_6][InBr_4]$ at 300 K with estimated standard deviations in parentheses. | S14 |
| <b>Table S10.</b> Anisotropic displacement parameters ( $\text{\AA}^2 \times 10^3$ ) for $(C_{11}H_{24}N_2)_2[In_{0.8}Sb_{0.2}Br_6][InBr_4]$ at 300.0 K with estimated standard deviations in parentheses.                                                | S16 |
| <b>Table S11.</b> Distortion degree of the $[In(Sb)Br_6]^{3-}$ octahedron and $[In(Sb)Br_4]^-$ tetrahedron for $(C_{11}H_{24}N_2)_2[InBr_6][InBr_4]:xSb^{3+}$ ( $x = 0, 0.05$ and $0.10$ ) at 150 K.                                                      | S18 |
| <b>Figure S1.</b> PXRD patterns of $(C_{11}H_{24}N_2)_2[InBr_6][InBr_4]$ for simulation based on the single-crystal refinements (blue), experimental data of fresh synthesized samples (black), and those in air for 3 months (red).                      | S18 |

**Figure S2.** Emission spectra at different excitation wavelength of (a)  $(C_{11}H_{24}N_2)_2[InBr_6][InBr_4]$ , and (e)  $(C_{11}H_{24}N_2)_2[InBr_6][InBr_4]:5\%Sb^{3+}$ . (b) Photoluminescent spectra of 1-(crylohexylmethyl)piperazine. Normalized (c) excitation and (d) emission spectra of  $(C_{11}H_{24}N_2)_2[InBr_6][InBr_4]:xSb^{3+}$ . (f) Integral PL intensity of  $(C_{11}H_{24}N_2)_2[InBr_6][InBr_4]:xSb^{3+}$ . S19

**Figure S3.** PLQY of (a)  $(C_{11}H_{24}N_2)_2[InBr_6][InBr_4]$ , and (b)  $(C_{11}H_{24}N_2)_2[InBr_6][InBr_4]:5\%Sb^{3+}$ . S19

**Figure S4.** Band gap value of  $(C_{11}H_{24}N_2)_2[InBr_6][InBr_4]$  obtained from Tauc plot. S20

**Figure S5.** Comparison of the PL spectra of the as-prepared  $(C_{11}H_{24}N_2)_2[InBr_6][InBr_4]:5\%Sb^{3+}$  and the one exposed in the air for 3 months. S20

**Figure S6.** Time-resolved decay curves of  $(C_{11}H_{24}N_2)_2[InBr_6][InBr_4]:xSb^{3+}$  by single exponential fit.

(a)-(f) correspond  $x = 0, 0.005, 0.01, 0.05, 0.10, 0.20$  in turn. S21

**Figure S7.** The structure mode used for calculating the Sb-doped  $(C_{11}H_{24}N_2)_2[InBr_6][InBr_4]$ . S21

**Table S1.** Crystal data and structure refinement of  $(C_{11}H_{24}N_2)_2[InBr_6][InBr_4]$  at 300 K.

|                                             |                                                                                                                                |
|---------------------------------------------|--------------------------------------------------------------------------------------------------------------------------------|
| Empirical formula                           | $(C_{11}H_{24}N_2)_2[InBr_6][InBr_4]$                                                                                          |
| Formula weight                              | 1397.38                                                                                                                        |
| Temperature                                 | 300 K                                                                                                                          |
| Wavelength                                  | 0.71073 Å                                                                                                                      |
| Crystal system                              | orthorhombic                                                                                                                   |
| Space group                                 | <i>Pbca</i>                                                                                                                    |
| Unit cell dimensions                        | $a = 15.7695(17)$ Å, $\alpha = 90^\circ$<br>$b = 15.8071(15)$ Å, $\beta = 90^\circ$<br>$c = 31.957(13)$ Å, $\gamma = 90^\circ$ |
| Volume                                      | 7965.8(15) Å <sup>3</sup>                                                                                                      |
| <i>Z</i>                                    | 8                                                                                                                              |
| Density (calculated)                        | 2.330 g/cm <sup>3</sup>                                                                                                        |
| Absorption coefficient                      | 11.210 mm <sup>-1</sup>                                                                                                        |
| <i>F</i> (000)                              | 5248                                                                                                                           |
| Crystal size                                | 0.18 × 0.15 × 0.08 mm <sup>3</sup>                                                                                             |
| $\theta$ range for data collection          | 2.225 to 26.458°                                                                                                               |
| Index ranges                                | $-19 \leq h \leq 19$<br>$-19 \leq k \leq 19$<br>$-40 \leq l \leq 40$                                                           |
| Reflections collected                       | 71812                                                                                                                          |
| Independent reflections                     | 8175 [ $R_{int} = 0.0948$ ]                                                                                                    |
| Completeness                                | 99.8%                                                                                                                          |
| Refinement method                           | Full-matrix least-squares on $F^2$                                                                                             |
| Data / restraints / parameters              | 8175/0/343                                                                                                                     |
| Goodness-of-fit                             | 1.014                                                                                                                          |
| Final <i>R</i> indices [ $I > 2\sigma(I)$ ] | $R_{obs} = 0.0558$ , $wR_{obs} = 0.1363$                                                                                       |
| <i>R</i> indices [all data]                 | $R_{all} = 0.1015$ , $wR_{all} = 0.1628$                                                                                       |
| Largest diff. peak and hole                 | 0.949 and -1.076 e·Å <sup>-3</sup>                                                                                             |

$$R = \frac{\sum||F_o| - |F_c||}{\sum|F_o|}, wR = \left\{ \frac{\sum[w(|F_o|^2 - |F_c|^2)^2]}{\sum[w(|F_o|^4)]} \right\}^{1/2} \text{ and } w = 1/[\sigma^2(F_o^2) + (0.0795P)^2 + 25.4742P] \text{ where } P = (F_o^2 + 2F_c^2)/3$$

**Table S2.** Atomic coordinates ( $\times 10^4$ ) and equivalent isotropic displacement parameters ( $\text{\AA}^2 \times 10^3$ ) for  $(\text{C}_{11}\text{H}_{24}\text{N}_2)_2[\text{InBr}_6][\text{InBr}_4]$  at 300 K with estimated standard deviations in parentheses.

| Label  | $x$     | $y$      | $z$     | Occupancy | $U_{\text{eq}}^*$ |
|--------|---------|----------|---------|-----------|-------------------|
| In(1)  | 3682(1) | 7816(1)  | 4812(1) | 1         | 49(1)             |
| In(2)  | 3662(1) | 4914(1)  | 7004(1) | 1         | 67(1)             |
| Br(3)  | 2320(1) | 7068(1)  | 4466(1) | 1         | 54(1)             |
| Br(5)  | 2549(1) | 8676(1)  | 5278(1) | 1         | 56(1)             |
| Br(4)  | 3683(1) | 6505(1)  | 5346(1) | 1         | 56(1)             |
| Br(2)  | 4880(1) | 6872(1)  | 4401(1) | 1         | 56(1)             |
| Br(6)  | 4955(1) | 8493(1)  | 5230(1) | 1         | 58(1)             |
| Br(1)  | 3677(1) | 8975(1)  | 4222(1) | 1         | 66(1)             |
| Br(8)  | 4962(1) | 5565(1)  | 7304(1) | 1         | 80(1)             |
| Br(9)  | 3506(1) | 3390(1)  | 7165(1) | 1         | 85(1)             |
| Br(7)  | 3750(2) | 5045(2)  | 6225(1) | 1         | 118(1)            |
| Br(10) | 2382(1) | 5727(2)  | 7216(1) | 1         | 134(1)            |
| N(2)   | 6151(5) | 9382(4)  | 3824(3) | 1         | 51(2)             |
| N(3)   | 5833(4) | 6340(4)  | 5425(3) | 1         | 52(2)             |
| N(1)   | 6569(5) | 8270(5)  | 4506(3) | 1         | 57(2)             |
| N(4)   | 6237(5) | 5196(5)  | 6112(3) | 1         | 59(2)             |
| C(2)   | 6117(6) | 8441(5)  | 3774(3) | 1         | 54(2)             |
| C(5)   | 5542(6) | 9797(6)  | 3521(3) | 1         | 58(3)             |
| C(3)   | 5976(5) | 9633(6)  | 4259(3) | 1         | 50(2)             |
| C(1)   | 6736(6) | 8024(6)  | 4071(3) | 1         | 57(2)             |
| C(17)  | 6691(6) | 3860(6)  | 6483(3) | 1         | 57(2)             |
| C(6)   | 5527(6) | 10758(6) | 3549(3) | 1         | 55(2)             |
| C(15)  | 6236(6) | 6149(6)  | 6159(3) | 1         | 60(3)             |
| C(11)  | 4953(7) | 11085(6) | 3203(4) | 1         | 70(3)             |
| C(14)  | 6468(6) | 5003(6)  | 5661(4) | 1         | 59(3)             |
| C(12)  | 5857(6) | 5415(6)  | 5362(3) | 1         | 56(2)             |

|       |          |          |         |   |        |
|-------|----------|----------|---------|---|--------|
| C(16) | 6842(7)  | 4803(7)  | 6408(4) | 1 | 76(3)  |
| C(7)  | 6405(7)  | 11136(6) | 3504(4) | 1 | 73(3)  |
| C(13) | 5627(6)  | 6564(6)  | 5861(3) | 1 | 57(2)  |
| C(4)  | 6603(6)  | 9206(6)  | 4558(4) | 1 | 62(3)  |
| C(18) | 5895(7)  | 3654(7)  | 6731(4) | 1 | 78(3)  |
| C(10) | 4889(10) | 12062(7) | 3222(5) | 1 | 96(4)  |
| C(20) | 6562(9)  | 2345(9)  | 7029(5) | 1 | 101(5) |
| C(8)  | 6350(8)  | 12103(6) | 3537(5) | 1 | 85(4)  |
| C(9)  | 5729(10) | 12464(8) | 3218(5) | 1 | 104(5) |
| C(22) | 7469(7)  | 3499(8)  | 6721(5) | 1 | 88(4)  |
| C(21) | 7347(8)  | 2545(7)  | 6790(4) | 1 | 83(4)  |
| C(19) | 5807(8)  | 2705(8)  | 6789(5) | 1 | 95(4)  |

\* $U_{\text{eq}}$  is defined as one third of the trace of the orthogonalized  $U_{ij}$  tensor.

**Table S3.** Anisotropic displacement parameters ( $\text{\AA}^2 \times 10^3$ ) for  $(\text{C}_{11}\text{H}_{24}\text{N}_2)_2[\text{InBr}_6][\text{InBr}_4]$  at 300 K with estimated standard deviations in parentheses.

| Label  | $U_{11}$ | $U_{22}$ | $U_{33}$ | $U_{12}$ | $U_{13}$ | $U_{23}$ |
|--------|----------|----------|----------|----------|----------|----------|
| In(1)  | 40(1)    | 52(1)    | 57(1)    | 1(1)     | 1(1)     | 6(1)     |
| In(2)  | 67(1)    | 67(1)    | 66(1)    | 4(1)     | -9(1)    | 7(1)     |
| Br(3)  | 45(1)    | 59(1)    | 57(1)    | -1(1)    | -2(1)    | -3(1)    |
| Br(5)  | 50(1)    | 53(1)    | 65(1)    | 2(1)     | 5(1)     | -4(1)    |
| Br(4)  | 44(1)    | 60(1)    | 66(1)    | 1(1)     | 1(1)     | 16(1)    |
| Br(2)  | 47(1)    | 58(1)    | 64(1)    | 0(1)     | 8(1)     | -3(1)    |
| Br(6)  | 47(1)    | 64(1)    | 63(1)    | -4(1)    | 1(1)     | -6(1)    |
| Br(1)  | 50(1)    | 72(1)    | 76(1)    | 1(1)     | 4(1)     | 24(1)    |
| Br(8)  | 76(1)    | 72(1)    | 94(1)    | 1(1)     | -22(1)   | 8(1)     |
| Br(9)  | 89(1)    | 75(1)    | 90(1)    | -2(1)    | 6(1)     | 20(1)    |
| Br(7)  | 162(2)   | 126(2)   | 66(1)    | -43(2)   | -24(1)   | 34(1)    |
| Br(10) | 71(1)    | 120(2)   | 211(2)   | 24(1)    | -32(1)   | -74(2)   |
| N(2)   | 54(4)    | 47(4)    | 51(5)    | 0(3)     | 5(4)     | 3(4)     |

|       |         |         |         |        |         |        |
|-------|---------|---------|---------|--------|---------|--------|
| N(3)  | 43(4)   | 56(4)   | 56(6)   | 0(3)   | -2(4)   | 7(4)   |
| N(1)  | 42(4)   | 57(4)   | 72(6)   | -1(3)  | 4(4)    | 22(4)  |
| N(4)  | 55(4)   | 64(5)   | 58(6)   | -9(4)  | -7(4)   | 7(4)   |
| C(2)  | 61(5)   | 50(5)   | 50(6)   | 0(4)   | 2(5)    | -3(4)  |
| C(5)  | 56(5)   | 54(5)   | 63(7)   | -5(4)  | -5(5)   | 5(5)   |
| C(3)  | 48(5)   | 55(5)   | 48(6)   | -1(4)  | 5(4)    | -2(4)  |
| C(1)  | 59(6)   | 51(5)   | 61(7)   | 4(4)   | 5(5)    | 9(5)   |
| C(17) | 59(5)   | 63(6)   | 50(7)   | 7(5)   | 2(5)    | 1(5)   |
| C(6)  | 59(5)   | 57(5)   | 50(6)   | 15(4)  | -11(5)  | -4(5)  |
| C(15) | 69(6)   | 54(5)   | 56(7)   | -1(5)  | -4(5)   | -12(5) |
| C(11) | 77(7)   | 66(6)   | 68(8)   | 23(5)  | -18(6)  | -5(6)  |
| C(14) | 48(5)   | 50(5)   | 80(8)   | 0(4)   | -8(5)   | -6(5)  |
| C(12) | 58(5)   | 50(5)   | 62(7)   | -6(4)  | -2(5)   | -4(5)  |
| C(16) | 75(7)   | 85(7)   | 68(8)   | -9(6)  | -20(6)  | 21(6)  |
| C(7)  | 74(7)   | 65(6)   | 79(9)   | -2(5)  | 2(6)    | 9(6)   |
| C(13) | 57(5)   | 51(5)   | 63(7)   | 1(4)   | 1(5)    | 5(5)   |
| C(4)  | 47(5)   | 63(6)   | 75(8)   | -9(4)  | -7(5)   | 9(5)   |
| C(18) | 71(7)   | 87(8)   | 76(9)   | 26(6)  | 26(6)   | 20(6)  |
| C(10) | 134(12) | 71(7)   | 83(10)  | 27(8)  | -39(9)  | 7(7)   |
| C(20) | 106(10) | 102(10) | 95(12)  | 14(8)  | 15(9)   | 40(8)  |
| C(8)  | 108(10) | 53(6)   | 94(10)  | -11(6) | -6(8)   | 9(6)   |
| C(9)  | 158(14) | 58(7)   | 97(12)  | -6(8)  | -25(10) | 22(7)  |
| C(22) | 63(6)   | 95(8)   | 106(11) | 5(6)   | -13(7)  | 26(8)  |
| C(21) | 85(8)   | 92(8)   | 72(9)   | 33(7)  | -14(7)  | 9(7)   |

---

The anisotropic displacement factor exponent takes the form:  $-2\pi^2[h^2a^*2U_{11} + \dots + 2hka^*b^*U_{12}]$ .

**Table S4.** Crystal data and structure refinement of  $(C_{11}H_{24}N_2)_2[InBr_6][InBr_4]:xSb^{3+}$  ( $x = 0, 0.05$  and  $0.10$ ) at 150 K.

| Empirical formula                      | $(C_{11}H_{24}N_2)_2[InBr_6][InBr_4]$                                | $(C_{11}H_{24}N_2)_2[In_{0.9}Sb_{0.1}Br_6][InBr_4]$                  | $(C_{11}H_{24}N_2)_2[In_{0.8}Sb_{0.2}Br_6][InBr_4]$                  |
|----------------------------------------|----------------------------------------------------------------------|----------------------------------------------------------------------|----------------------------------------------------------------------|
| Formula weight                         | 1397.38                                                              | 1398.07                                                              | 1398.77                                                              |
| Temperature                            | 150 K                                                                |                                                                      |                                                                      |
| Wavelength                             | 0.71073 Å                                                            |                                                                      |                                                                      |
| Crystal system                         | orthorhombic                                                         | orthorhombic                                                         | orthorhombic                                                         |
| Space group                            | <i>Pbca</i>                                                          | <i>Pbca</i>                                                          | <i>Pbca</i>                                                          |
| Unit cell dimensions                   | $a = 15.6904(5)$ Å<br>$b = 15.6905(5)$ Å<br>$c = 31.7718(13)$ Å      | $a = 15.7197(7)$ Å<br>$b = 15.7070(6)$ Å<br>$c = 31.7425(14)$ Å      | $a = 15.7544(5)$ Å<br>$b = 15.6813(5)$ Å<br>$c = 31.7067(11)$ Å      |
| Volume                                 | $7821.9(5)$ Å <sup>3</sup>                                           | $7837.5(6)$ Å <sup>3</sup>                                           | $7833.1(4)$ Å <sup>3</sup>                                           |
| Z                                      | 8                                                                    | 8                                                                    | 8                                                                    |
| Density (calculated)                   | 2.373 g/cm <sup>3</sup>                                              | 2.370 g/cm <sup>3</sup>                                              | 2.369 g/cm <sup>3</sup>                                              |
| Absorption coefficient                 | 11.416 mm <sup>-1</sup>                                              | 11.404 mm <sup>-1</sup>                                              | 11.420 mm <sup>-1</sup>                                              |
| $F(000)$                               | 5248                                                                 | 5250                                                                 | 5235                                                                 |
| $\theta$ range for data collection     | 1.944 to 26.476°                                                     | 2.237 to 26.399°                                                     | 2.238 to 26.403°                                                     |
| Index ranges                           | $-19 \leq h \leq 19$<br>$-19 \leq k \leq 19$<br>$-39 \leq l \leq 39$ | $-19 \leq h \leq 19$<br>$-19 \leq k \leq 19$<br>$-39 \leq l \leq 39$ | $-15 \leq h \leq 19$<br>$-19 \leq k \leq 19$<br>$-39 \leq l \leq 39$ |
| Reflections collected                  | 104432                                                               | 74336                                                                | 80310                                                                |
| Independent reflections                | 8050 [ $R_{int} = 0.0692$ ]                                          | 8015 [ $R_{int} = 0.1037$ ]                                          | 8019 [ $R_{int} = 0.0945$ ]                                          |
| Completeness                           | 99.8%                                                                | 99.9%                                                                | 99.8%                                                                |
| Refinement method                      | Full-matrix least squares on $F^2$                                   |                                                                      |                                                                      |
| Data/restraints/parameters             | 8050/0/343                                                           | 8015/0/343                                                           | 8019/0/343                                                           |
| Goodness-of-fit                        | 1.032                                                                | 1.026                                                                | 1.020                                                                |
| Final $R$ indices [ $I > 2\sigma(I)$ ] | $R_{obs} = 0.0346$<br>$wR_{obs} = 0.0786$                            | $R_{obs} = 0.0464$<br>$wR_{obs} = 0.0847$                            | $R_{obs} = 0.0466$<br>$wR_{obs} = 0.1087$                            |
| $R$ indices [all data]                 | $R_{all} = 0.0480$<br>$wR_{all} = 0.0843$                            | $R_{all} = 0.0789$<br>$wR_{all} = 0.0945$                            | $R_{all} = 0.0724$<br>$wR_{all} = 0.1231$                            |
| Largest diff. peak and hole            | 0.898 and -0.819 e <sup>-</sup> Å <sup>-3</sup>                      | 0.654 and -0.663 e <sup>-</sup> Å <sup>-3</sup>                      | 1.039 and -0.794 e <sup>-</sup> Å <sup>-3</sup>                      |



**Table S5.** Atomic coordinates ( $\times 10^4$ ) and equivalent isotropic displacement parameters ( $\text{\AA}^2 \times 10^3$ ) for  $(\text{C}_{11}\text{H}_{24}\text{N}_2)_2[\text{InBr}_6][\text{InBr}_4]$  at 150 K with estimated standard deviations in parentheses.

| Label  | $x$     | $y$      | $z$     | Occupancy | $U_{\text{eq}}^*$ |
|--------|---------|----------|---------|-----------|-------------------|
| In(1)  | 3669(1) | 2809(1)  | 4796(1) | 1         | 29(1)             |
| In(2)  | 6338(1) | 10097(1) | 2994(1) | 1         | 38(1)             |
| Br(4)  | 2535(1) | 3672(1)  | 5269(1) | 1         | 32(1)             |
| Br(6)  | 3672(1) | 1489(1)  | 5331(1) | 1         | 32(1)             |
| Br(5)  | 2295(1) | 2059(1)  | 4450(1) | 1         | 31(1)             |
| Br(2)  | 4944(1) | 3491(1)  | 5225(1) | 1         | 33(1)             |
| Br(1)  | 4885(1) | 1873(1)  | 4386(1) | 1         | 32(1)             |
| Br(3)  | 3665(1) | 3975(1)  | 4202(1) | 1         | 36(1)             |
| Br(8)  | 5027(1) | 9439(1)  | 2690(1) | 1         | 42(1)             |
| Br(9)  | 6514(1) | 11631(1) | 2833(1) | 1         | 44(1)             |
| Br(10) | 6249(1) | 9965(1)  | 3783(1) | 1         | 64(1)             |
| Br(7)  | 7631(1) | 9271(1)  | 2784(1) | 1         | 76(1)             |
| N(4)   | 6148(2) | 4393(2)  | 3815(2) | 1         | 30(1)             |
| N(1)   | 5813(2) | 1344(2)  | 5419(2) | 1         | 30(1)             |
| N(2)   | 6205(3) | 204(3)   | 6115(2) | 1         | 33(1)             |
| N(3)   | 6560(3) | 3287(3)  | 4514(2) | 1         | 33(1)             |
| C(16)  | 5537(3) | 4790(3)  | 3505(2) | 1         | 34(2)             |
| C(12)  | 6588(3) | 4235(3)  | 4561(2) | 1         | 34(2)             |
| C(14)  | 5969(3) | 4650(3)  | 4262(2) | 1         | 30(1)             |
| C(3)   | 5841(3) | 400(3)   | 5363(2) | 1         | 33(2)             |
| C(18)  | 4946(4) | 6104(3)  | 3186(2) | 1         | 37(2)             |
| C(15)  | 6124(3) | 3441(3)  | 3774(2) | 1         | 36(2)             |
| C(5)   | 6808(3) | -198(3)  | 6434(2) | 1         | 39(2)             |
| C(2)   | 6198(3) | 1150(3)  | 6169(2) | 1         | 36(2)             |
| C(17)  | 5513(3) | 5762(3)  | 3538(2) | 1         | 32(2)             |
| C(21)  | 6320(4) | 7134(3)  | 3554(2) | 1         | 46(2)             |

|       |         |          |         |   |       |
|-------|---------|----------|---------|---|-------|
| C(1)  | 5597(3) | 1574(3)  | 5862(2) | 1 | 34(2) |
| C(6)  | 6676(3) | -1151(3) | 6490(2) | 1 | 35(2) |
| C(4)  | 6456(3) | 0(3)     | 5667(2) | 1 | 32(2) |
| C(13) | 6746(3) | 3024(3)  | 4076(2) | 1 | 35(2) |
| C(20) | 5707(4) | 7507(4)  | 3234(2) | 1 | 52(2) |
| C(22) | 6396(3) | 6168(3)  | 3512(2) | 1 | 39(2) |
| C(7)  | 5861(3) | -1366(3) | 6734(2) | 1 | 41(2) |
| C(19) | 4845(4) | 7066(3)  | 3233(2) | 1 | 48(2) |
| C(11) | 7463(4) | -1519(4) | 6712(2) | 1 | 43(2) |
| C(9)  | 6566(4) | -2672(4) | 7029(2) | 1 | 49(2) |
| C(8)  | 5781(4) | -2323(4) | 6800(2) | 1 | 50(2) |
| C(10) | 7371(4) | -2467(4) | 6788(2) | 1 | 46(2) |

\* $U_{\text{eq}}$  is defined as one third of the trace of the orthogonalized  $U_{ij}$  tensor.

**Table S6.** Anisotropic displacement parameters ( $\text{\AA}^2 \times 10^3$ ) for  $(\text{C}_{11}\text{H}_{24}\text{N}_2)_2[\text{InBr}_6][\text{InBr}_4]$  at 150 K with estimated standard deviations in parentheses.

| Label  | $U_{11}$ | $U_{22}$ | $U_{33}$ | $U_{12}$ | $U_{13}$ | $U_{23}$ |
|--------|----------|----------|----------|----------|----------|----------|
| In(1)  | 25(1)    | 30(1)    | 33(1)    | 0(1)     | 1(1)     | 3(1)     |
| In(2)  | 38(1)    | 38(1)    | 38(1)    | 2(1)     | -5(1)    | 3(1)     |
| Br(4)  | 29(1)    | 30(1)    | 36(1)    | 1(1)     | 2(1)     | -2(1)    |
| Br(6)  | 26(1)    | 33(1)    | 36(1)    | 0(1)     | 0(1)     | 7(1)     |
| Br(5)  | 27(1)    | 33(1)    | 32(1)    | 0(1)     | -1(1)    | -2(1)    |
| Br(2)  | 28(1)    | 35(1)    | 36(1)    | -2(1)    | 0(1)     | -3(1)    |
| Br(1)  | 28(1)    | 32(1)    | 36(1)    | 0(1)     | 4(1)     | -2(1)    |
| Br(3)  | 30(1)    | 39(1)    | 41(1)    | 1(1)     | 1(1)     | 10(1)    |
| Br(8)  | 41(1)    | 38(1)    | 47(1)    | 0(1)     | -10(1)   | 5(1)     |
| Br(9)  | 46(1)    | 41(1)    | 46(1)    | -1(1)    | 3(1)     | 9(1)     |
| Br(10) | 86(1)    | 66(1)    | 38(1)    | -25(1)   | -15(1)   | 17(1)    |
| Br(7)  | 40(1)    | 67(1)    | 122(1)   | 14(1)    | -21(1)   | -44(1)   |
| N(4)   | 29(2)    | 27(2)    | 34(2)    | 0(2)     | 3(2)     | -1(2)    |

|       |       |       |       |       |        |       |
|-------|-------|-------|-------|-------|--------|-------|
| N(1)  | 25(2) | 30(2) | 36(2) | -1(2) | -2(2)  | 1(2)  |
| N(2)  | 30(2) | 36(2) | 33(2) | -4(2) | -1(2)  | 3(2)  |
| N(3)  | 27(2) | 33(2) | 38(2) | -1(2) | -2(2)  | 6(2)  |
| C(16) | 33(3) | 41(3) | 30(3) | 2(2)  | -4(2)  | 3(2)  |
| C(12) | 32(3) | 33(3) | 36(3) | -3(2) | -2(2)  | -2(2) |
| C(14) | 28(2) | 34(3) | 29(3) | 4(2)  | 0(2)   | 1(2)  |
| C(3)  | 34(3) | 32(3) | 34(3) | -4(2) | -4(2)  | -1(2) |
| C(18) | 43(3) | 33(3) | 36(3) | 7(2)  | -7(2)  | -5(2) |
| C(15) | 44(3) | 28(2) | 37(3) | -3(2) | 4(2)   | -1(2) |
| C(5)  | 37(3) | 46(3) | 35(3) | 1(2)  | -8(2)  | 3(2)  |
| C(2)  | 38(3) | 35(3) | 33(3) | -5(2) | -2(2)  | -4(2) |
| C(17) | 30(3) | 35(3) | 29(3) | 4(2)  | -1(2)  | 1(2)  |
| C(21) | 59(4) | 34(3) | 45(3) | -5(3) | -6(3)  | -3(2) |
| C(1)  | 33(3) | 32(3) | 37(3) | -2(2) | 2(2)   | 0(2)  |
| C(6)  | 32(3) | 39(3) | 33(3) | 1(2)  | 1(2)   | 0(2)  |
| C(4)  | 31(3) | 31(3) | 32(3) | 1(2)  | 1(2)   | -5(2) |
| C(13) | 34(3) | 31(3) | 39(3) | 0(2)  | 3(2)   | 0(2)  |
| C(20) | 74(4) | 33(3) | 49(4) | 1(3)  | -3(3)  | 4(3)  |
| C(22) | 39(3) | 37(3) | 41(3) | 1(2)  | 1(2)   | 4(2)  |
| C(7)  | 39(3) | 43(3) | 41(3) | 9(2)  | 7(2)   | 6(2)  |
| C(19) | 67(4) | 39(3) | 37(3) | 18(3) | -16(3) | -6(3) |
| C(11) | 44(3) | 47(3) | 38(3) | 5(3)  | -5(2)  | 1(3)  |
| C(9)  | 57(4) | 41(3) | 50(4) | 11(3) | 9(3)   | 17(3) |
| C(8)  | 39(3) | 49(3) | 61(4) | 1(3)  | 13(3)  | 16(3) |
| C(10) | 44(3) | 50(3) | 43(3) | 13(3) | -4(3)  | 9(3)  |

The anisotropic displacement factor exponent takes the form:  $-2\pi^2[h^2a^*2U_{11} + \dots + 2hka^*b^*U_{12}]$ .

**Table S7.** Atomic coordinates ( $\times 10^4$ ) and equivalent isotropic displacement parameters ( $\text{\AA}^2 \times 10^3$ ) for  $(\text{C}_{11}\text{H}_{24}\text{N}_2)_2[\text{In}_{0.9}\text{Sb}_{0.1}\text{Br}_6][\text{InBr}_4]$  at 150 K with estimated standard deviations in parentheses.

| Label | <i>x</i> | <i>y</i> | <i>z</i> | Occupancy | $U_{\text{eq}}^*$ |
|-------|----------|----------|----------|-----------|-------------------|
|-------|----------|----------|----------|-----------|-------------------|

|        |         |          |         |     |       |
|--------|---------|----------|---------|-----|-------|
| In(1)  | 1331(1) | 2817(1)  | 4791(1) | 0.9 | 31(1) |
| Sb(1)  | 1331(1) | 2817(1)  | 4791(1) | 0.1 | 31(1) |
| In(2)  | 1354(1) | -106(1)  | 7008(1) | 1   | 40(1) |
| Br(4)  | 1332(1) | 1482(1)  | 5329(1) | 1   | 34(1) |
| Br(2)  | 2459(1) | 3679(1)  | 5269(1) | 1   | 34(1) |
| Br(6)  | 56(1)   | 3495(1)  | 5226(1) | 1   | 35(1) |
| Br(3)  | 2727(1) | 2063(1)  | 4447(1) | 1   | 36(1) |
| Br(5)  | 94(1)   | 1859(1)  | 4385(1) | 1   | 38(1) |
| Br(1)  | 1337(1) | 4004(1)  | 4195(1) | 1   | 42(1) |
| Br(10) | 38(1)   | 548(1)   | 7308(1) | 1   | 44(1) |
| Br(9)  | 1520(1) | -1646(1) | 7164(1) | 1   | 46(1) |
| Br(7)  | 1287(1) | 44(1)    | 6220(1) | 1   | 70(1) |
| Br(8)  | 2640(1) | 708(1)   | 7234(1) | 1   | 82(1) |
| N(1)   | 4191(4) | 3664(3)  | 4578(2) | 1   | 32(2) |
| N(4)   | 3846(4) | 614(4)   | 6186(2) | 1   | 34(2) |
| N(3)   | 3432(4) | 1720(4)  | 5489(2) | 1   | 36(2) |
| N(2)   | 3799(4) | 4815(4)  | 3883(2) | 1   | 32(2) |
| C(15)  | 3416(5) | 776(4)   | 5438(2) | 1   | 36(2) |
| C(13)  | 3860(5) | 1556(4)  | 6225(2) | 1   | 37(2) |
| C(16)  | 4459(5) | 212(4)   | 6493(2) | 1   | 35(2) |
| C(22)  | 5063(5) | -1103(5) | 6806(3) | 1   | 41(2) |
| C(6)   | 3336(5) | 6165(5)  | 3510(2) | 1   | 35(2) |
| C(18)  | 3617(5) | -1173(5) | 6495(3) | 1   | 41(2) |
| C(14)  | 4035(4) | 359(4)   | 5736(2) | 1   | 31(2) |
| C(12)  | 3246(5) | 1976(4)  | 5927(2) | 1   | 38(2) |
| C(17)  | 4491(5) | -760(4)  | 6460(2) | 1   | 32(2) |
| C(5)   | 3196(5) | 5209(5)  | 3570(2) | 1   | 40(2) |
| C(4)   | 4163(5) | 4607(4)  | 4644(2) | 1   | 34(2) |
| C(19)  | 3695(5) | -2139(5) | 6447(3) | 1   | 46(2) |
| C(1)   | 4413(5) | 3442(5)  | 4136(2) | 1   | 38(2) |

|       |         |          |         |   |       |
|-------|---------|----------|---------|---|-------|
| C(2)  | 3815(5) | 3860(4)  | 3828(2) | 1 | 37(2) |
| C(11) | 4139(5) | 6378(5)  | 3268(3) | 1 | 45(2) |
| C(3)  | 3543(5) | 5006(4)  | 4333(2) | 1 | 34(2) |
| C(20) | 4313(6) | -2504(5) | 6763(3) | 1 | 52(2) |
| C(21) | 5169(6) | -2059(5) | 6763(3) | 1 | 49(2) |
| C(7)  | 2549(5) | 6522(5)  | 3281(3) | 1 | 44(2) |
| C(8)  | 2639(5) | 7481(5)  | 3213(3) | 1 | 48(2) |
| C(10) | 4220(5) | 7336(5)  | 3202(3) | 1 | 52(2) |
| C(9)  | 3440(6) | 7691(6)  | 2978(3) | 1 | 55(2) |

\* $U_{eq}$  is defined as one third of the trace of the orthogonalized  $U_{ij}$  tensor.

**Table S8.** Anisotropic displacement parameters ( $\text{\AA}^2 \times 10^3$ ) for  $(C_{11}H_{24}N_2)_2[In_{0.9}Sb_{0.1}Br_6][InBr_4]$  at 150 K with estimated standard deviations in parentheses.

| Label  | $U_{11}$ | $U_{22}$ | $U_{33}$ | $U_{12}$ | $U_{13}$ | $U_{23}$ |
|--------|----------|----------|----------|----------|----------|----------|
| In(1)  | 28(1)    | 31(1)    | 33(1)    | -1(1)    | -1(1)    | 2(1)     |
| Sb(1)  | 28(1)    | 31(1)    | 33(1)    | -1(1)    | -1(1)    | 2(1)     |
| In(2)  | 44(1)    | 39(1)    | 37(1)    | -2(1)    | 6(1)     | 2(1)     |
| Br(4)  | 32(1)    | 35(1)    | 35(1)    | -1(1)    | 0(1)     | 7(1)     |
| Br(2)  | 34(1)    | 32(1)    | 37(1)    | -1(1)    | -2(1)    | -2(1)    |
| Br(6)  | 33(1)    | 37(1)    | 36(1)    | 2(1)     | -1(1)    | -4(1)    |
| Br(3)  | 38(1)    | 35(1)    | 33(1)    | 0(1)     | 0(1)     | -1(1)    |
| Br(5)  | 41(1)    | 37(1)    | 37(1)    | 5(1)     | -5(1)    | -2(1)    |
| Br(1)  | 35(1)    | 50(1)    | 42(1)    | -1(1)    | -2(1)    | 8(1)     |
| Br(10) | 45(1)    | 41(1)    | 48(1)    | -1(1)    | 10(1)    | 6(1)     |
| Br(9)  | 50(1)    | 42(1)    | 45(1)    | 1(1)     | -4(1)    | 8(1)     |
| Br(7)  | 103(1)   | 69(1)    | 38(1)    | 28(1)    | 16(1)    | 18(1)    |
| Br(8)  | 45(1)    | 71(1)    | 130(2)   | -15(1)   | 23(1)    | -49(1)   |
| N(1)   | 27(3)    | 31(3)    | 39(4)    | -3(3)    | -5(3)    | 4(3)     |
| N(4)   | 32(3)    | 33(3)    | 37(4)    | 2(3)     | 3(3)     | -2(3)    |
| N(3)   | 28(3)    | 38(3)    | 40(4)    | 0(3)     | -7(3)    | 6(3)     |

|       |       |       |       |       |        |       |
|-------|-------|-------|-------|-------|--------|-------|
| N(2)  | 36(4) | 35(3) | 25(3) | 0(3)  | 4(3)   | -1(3) |
| C(15) | 34(4) | 34(4) | 38(5) | 1(3)  | -4(3)  | -5(3) |
| C(13) | 44(5) | 27(4) | 39(5) | -1(3) | 3(4)   | 3(3)  |
| C(16) | 39(4) | 36(4) | 30(4) | 1(3)  | -7(3)  | -2(3) |
| C(22) | 44(5) | 39(4) | 40(5) | 4(4)  | -4(4)  | 2(4)  |
| C(6)  | 37(4) | 36(4) | 31(4) | -1(3) | -3(3)  | 0(3)  |
| C(18) | 40(5) | 38(4) | 46(5) | -2(4) | 3(4)   | 1(4)  |
| C(14) | 29(4) | 33(4) | 31(4) | 1(3)  | 1(3)   | 0(3)  |
| C(12) | 44(5) | 28(4) | 41(5) | 2(3)  | 6(4)   | 1(3)  |
| C(17) | 41(4) | 29(4) | 24(4) | 5(3)  | 2(3)   | 1(3)  |
| C(5)  | 39(5) | 47(5) | 33(5) | 0(4)  | -6(4)  | 12(4) |
| C(4)  | 40(4) | 30(4) | 33(4) | -6(3) | 0(4)   | -2(3) |
| C(19) | 51(5) | 33(4) | 54(5) | -3(4) | -6(4)  | -2(4) |
| C(1)  | 37(4) | 42(4) | 35(5) | 3(4)  | 3(4)   | -4(4) |
| C(2)  | 45(5) | 28(4) | 37(5) | -4(3) | -5(4)  | -2(3) |
| C(11) | 41(5) | 49(5) | 44(5) | 12(4) | 3(4)   | 8(4)  |
| C(3)  | 35(4) | 33(4) | 34(4) | 0(3)  | 3(3)   | 2(3)  |
| C(20) | 80(7) | 38(4) | 39(5) | 4(5)  | -1(5)  | 2(4)  |
| C(21) | 71(6) | 37(4) | 40(5) | 19(4) | -18(4) | -5(4) |
| C(7)  | 49(5) | 51(5) | 33(5) | 7(4)  | -13(4) | 1(4)  |
| C(8)  | 48(5) | 54(5) | 42(5) | 20(4) | 1(4)   | 11(4) |
| C(10) | 50(6) | 50(5) | 57(6) | 7(4)  | 11(5)  | 24(4) |
| C(9)  | 58(6) | 58(6) | 49(6) | 13(5) | 18(5)  | 20(4) |

The anisotropic displacement factor exponent takes the form:  $-2\pi^2[h^2a^{*2}U_{11} + \dots + 2hka^*b^*U_{12}]$ .

**Table S9.** Atomic coordinates ( $\times 10^4$ ) and equivalent isotropic displacement parameters ( $\text{\AA}^2 \times 10^3$ ) for  $(\text{C}_{11}\text{H}_{24}\text{N}_2)_2[\text{In}_{0.8}\text{Sb}_{0.2}\text{Br}_6][\text{InBr}_4]$  at 150 K with estimated standard deviations in parentheses.

| Label | $x$     | $y$     | $z$     | Occupancy | $U_{\text{eq}}^*$ |
|-------|---------|---------|---------|-----------|-------------------|
| In(1) | 6331(1) | 2179(1) | 5213(1) | 0.8       | 33(1)             |
| Sb(1) | 6331(1) | 2179(1) | 5213(1) | 0.2       | 33(1)             |

|        |          |         |         |   |       |
|--------|----------|---------|---------|---|-------|
| In(2)  | 6365(1)  | 5113(1) | 2989(1) | 1 | 43(1) |
| Br(1)  | 6334(1)  | 3521(1) | 4672(1) | 1 | 37(1) |
| Br(5)  | 7454(1)  | 1316(1) | 4732(1) | 1 | 37(1) |
| Br(3)  | 5058(1)  | 1504(1) | 4775(1) | 1 | 39(1) |
| Br(6)  | 7743(1)  | 2934(1) | 5555(1) | 1 | 40(1) |
| Br(2)  | 5078(1)  | 3151(1) | 5615(1) | 1 | 44(1) |
| Br(4)  | 6336(1)  | 976(1)  | 5809(1) | 1 | 47(1) |
| Br(8)  | 5048(1)  | 4462(1) | 2694(1) | 1 | 47(1) |
| Br(7)  | 6524(1)  | 6657(1) | 2838(1) | 1 | 49(1) |
| Br(9)  | 6316(1)  | 4950(1) | 3778(1) | 1 | 76(1) |
| Br(10) | 7648(1)  | 4307(1) | 2753(1) | 1 | 87(1) |
| N(2)   | 8841(4)  | 4387(4) | 3814(2) | 1 | 33(2) |
| N(1)   | 8431(4)  | 3274(4) | 4510(2) | 1 | 40(2) |
| N(3)   | 4192(4)  | 3667(4) | 4577(2) | 1 | 36(2) |
| N(4)   | 3796(4)  | 4825(4) | 3892(2) | 1 | 38(2) |
| C(5)   | 9450(5)  | 4782(5) | 3502(3) | 1 | 40(2) |
| C(3)   | 8852(5)  | 3438(4) | 3772(3) | 1 | 38(2) |
| C(2)   | 9031(5)  | 4629(5) | 4261(2) | 1 | 34(2) |
| C(6)   | 9490(5)  | 5745(5) | 3539(2) | 1 | 36(2) |
| C(17)  | 3333(5)  | 6176(5) | 3515(3) | 1 | 39(2) |
| C(4)   | 8244(5)  | 3017(5) | 4070(3) | 1 | 43(2) |
| C(1)   | 8415(5)  | 4220(5) | 4563(3) | 1 | 38(2) |
| C(12)  | 4159(5)  | 4608(4) | 4642(2) | 1 | 36(2) |
| C(11)  | 10070(6) | 6095(5) | 3190(3) | 1 | 47(2) |
| C(7)   | 8625(5)  | 6176(5) | 3514(3) | 1 | 43(2) |
| C(16)  | 3204(5)  | 5217(5) | 3565(3) | 1 | 44(2) |
| C(14)  | 3831(5)  | 3870(5) | 3829(3) | 1 | 41(2) |
| C(22)  | 4140(5)  | 6392(5) | 3270(3) | 1 | 45(2) |
| C(20)  | 3444(6)  | 7705(6) | 2974(3) | 1 | 55(2) |
| C(19)  | 2646(5)  | 7490(5) | 3206(3) | 1 | 46(2) |

|       |          |         |         |   |       |
|-------|----------|---------|---------|---|-------|
| C(15) | 4424(5)  | 3447(5) | 4137(2) | 1 | 42(2) |
| C(13) | 3540(5)  | 5007(5) | 4332(3) | 1 | 38(2) |
| C(18) | 2551(5)  | 6538(5) | 3284(3) | 1 | 47(2) |
| C(8)  | 8710(6)  | 7138(5) | 3558(3) | 1 | 50(2) |
| C(9)  | 9331(6)  | 7507(5) | 3233(3) | 1 | 58(2) |
| C(10) | 10184(6) | 7050(5) | 3240(3) | 1 | 55(2) |
| C(21) | 4225(5)  | 7352(6) | 3205(3) | 1 | 55(2) |

\* $U_{eq}$  is defined as one third of the trace of the orthogonalized  $U_{ij}$  tensor.

**Table S10.** Anisotropic displacement parameters ( $\text{\AA}^2 \times 10^3$ ) for  $(\text{C}_{11}\text{H}_{24}\text{N}_2)_2[\text{In}_{0.8}\text{Sb}_{0.2}\text{Br}_6][\text{InBr}_4]$  at 150 K with estimated standard deviations in parentheses.

| Label  | $U_{11}$ | $U_{22}$ | $U_{33}$ | $U_{12}$ | $U_{13}$ | $U_{23}$ |
|--------|----------|----------|----------|----------|----------|----------|
| In(1)  | 31(1)    | 34(1)    | 36(1)    | 1(1)     | 0(1)     | 2(1)     |
| Sb(1)  | 31(1)    | 34(1)    | 36(1)    | 1(1)     | 0(1)     | 2(1)     |
| In(2)  | 46(1)    | 42(1)    | 42(1)    | 3(1)     | -6(1)    | 2(1)     |
| Br(1)  | 34(1)    | 38(1)    | 39(1)    | 0(1)     | 0(1)     | 6(1)     |
| Br(5)  | 37(1)    | 35(1)    | 41(1)    | 1(1)     | 3(1)     | -2(1)    |
| Br(3)  | 36(1)    | 40(1)    | 39(1)    | -2(1)    | 0(1)     | -3(1)    |
| Br(6)  | 45(1)    | 39(1)    | 38(1)    | 0(1)     | 1(1)     | -1(1)    |
| Br(2)  | 49(1)    | 43(1)    | 39(1)    | -8(1)    | 6(1)     | -2(1)    |
| Br(4)  | 36(1)    | 57(1)    | 48(1)    | 0(1)     | 2(1)     | 8(1)     |
| Br(8)  | 47(1)    | 44(1)    | 51(1)    | 1(1)     | -8(1)    | 6(1)     |
| Br(7)  | 52(1)    | 45(1)    | 50(1)    | 0(1)     | 4(1)     | 8(1)     |
| Br(9)  | 115(1)   | 73(1)    | 42(1)    | -32(1)   | -20(1)   | 19(1)    |
| Br(10) | 48(1)    | 76(1)    | 137(2)   | 17(1)    | -26(1)   | -52(1)   |
| N(2)   | 36(3)    | 31(3)    | 32(3)    | 1(3)     | 2(3)     | 0(3)     |
| N(1)   | 34(3)    | 39(3)    | 46(4)    | 0(3)     | 4(3)     | 2(3)     |
| N(3)   | 33(3)    | 30(3)    | 44(4)    | -1(2)    | -3(3)    | 6(3)     |
| N(4)   | 42(3)    | 40(3)    | 33(4)    | -1(3)    | 0(3)     | 1(3)     |
| C(5)   | 33(4)    | 47(4)    | 40(5)    | -2(3)    | 7(3)     | 2(4)     |



|       |       |       |       |        |        |       |
|-------|-------|-------|-------|--------|--------|-------|
| C(3)  | 46(4) | 32(4) | 38(5) | 1(3)   | -2(3)  | 4(3)  |
| C(2)  | 40(4) | 36(4) | 26(4) | -2(3)  | -2(3)  | -4(3) |
| C(6)  | 44(4) | 35(4) | 30(4) | -5(3)  | -3(3)  | -5(3) |
| C(17) | 36(4) | 44(4) | 37(5) | 4(3)   | -7(3)  | 1(3)  |
| C(4)  | 37(4) | 38(4) | 54(5) | 0(3)   | -2(4)  | 0(4)  |
| C(1)  | 37(4) | 35(4) | 42(5) | 1(3)   | 6(3)   | 3(3)  |
| C(12) | 37(4) | 32(4) | 39(4) | -4(3)  | -6(3)  | 0(3)  |
| C(11) | 57(5) | 39(4) | 46(5) | -9(4)  | 12(4)  | -5(4) |
| C(7)  | 48(5) | 35(4) | 46(5) | -9(3)  | 5(4)   | -6(4) |
| C(16) | 42(4) | 51(5) | 38(5) | 1(4)   | -13(4) | 7(4)  |
| C(14) | 50(5) | 40(4) | 33(4) | -5(3)  | -1(4)  | -2(3) |
| C(22) | 46(5) | 45(5) | 44(5) | 4(4)   | 5(4)   | 6(4)  |
| C(20) | 54(5) | 60(6) | 50(6) | 11(4)  | 8(4)   | 15(4) |
| C(19) | 46(5) | 54(5) | 38(5) | 13(4)  | 9(4)   | 4(4)  |
| C(15) | 44(4) | 45(4) | 37(5) | 5(4)   | 6(4)   | -1(4) |
| C(13) | 40(4) | 33(4) | 42(5) | -2(3)  | -5(3)  | -2(3) |
| C(18) | 49(5) | 55(5) | 37(5) | 3(4)   | -6(4)  | 6(4)  |
| C(8)  | 63(6) | 33(4) | 55(6) | 7(4)   | 1(4)   | 1(4)  |
| C(9)  | 77(6) | 35(4) | 63(6) | -6(4)  | 6(5)   | 6(4)  |
| C(10) | 73(6) | 48(5) | 43(5) | -18(4) | 21(5)  | -7(4) |
| C(21) | 48(5) | 55(5) | 63(6) | 5(4)   | 14(5)  | 18(5) |

---

The anisotropic displacement factor exponent takes the form:  $-2\pi^2[h^2a^{*2}U_{11} + \dots + 2hka^*b^*U_{12}]$ .

**Table S11.** Distortion degree of the  $[\text{In}(\text{Sb})\text{Br}_6]^{3-}$  octahedron and  $[\text{In}(\text{Sb})\text{Br}_4]^-$  tetrahedron for  $(\text{C}_{11}\text{H}_{24}\text{N}_2)_2[\text{InBr}_6][\text{InBr}_4]:x\text{Sb}^{3+}$  ( $x = 0, 0.05$  and  $0.10$ ) at 150 K.

| $x$              | 0                     | 0.05                  | 0.10                  |
|------------------|-----------------------|-----------------------|-----------------------|
| $\lambda_{oct}$  | $1.69 \times 10^{-4}$ | $2.29 \times 10^{-4}$ | $3.09 \times 10^{-4}$ |
| $\delta_{oct}^2$ | 18.07                 | 21.36                 | 23.98                 |
| $\lambda_{tet}$  | $2.08 \times 10^{-5}$ | $1.95 \times 10^{-5}$ | $2.03 \times 10^{-5}$ |
| $\delta_{tet}^2$ | 10.25                 | 9.96                  | 9.57                  |

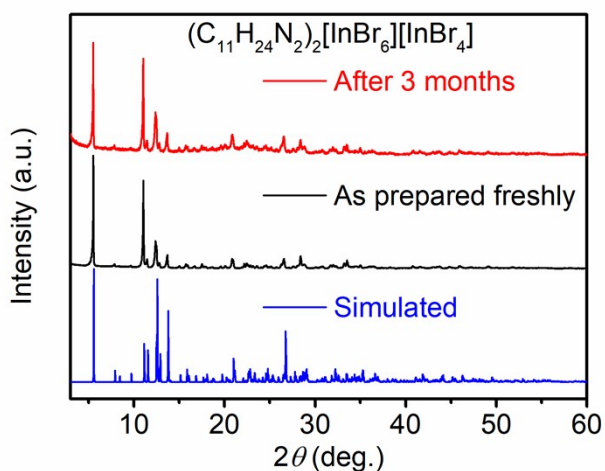

**Figure S1.** PXRD patterns of  $(\text{C}_{11}\text{H}_{24}\text{N}_2)_2[\text{InBr}_6][\text{InBr}_4]$  for simulation based on the single-crystal refinements (blue), experimental data of fresh synthesized samples (black), and those in air for 3 months (red).

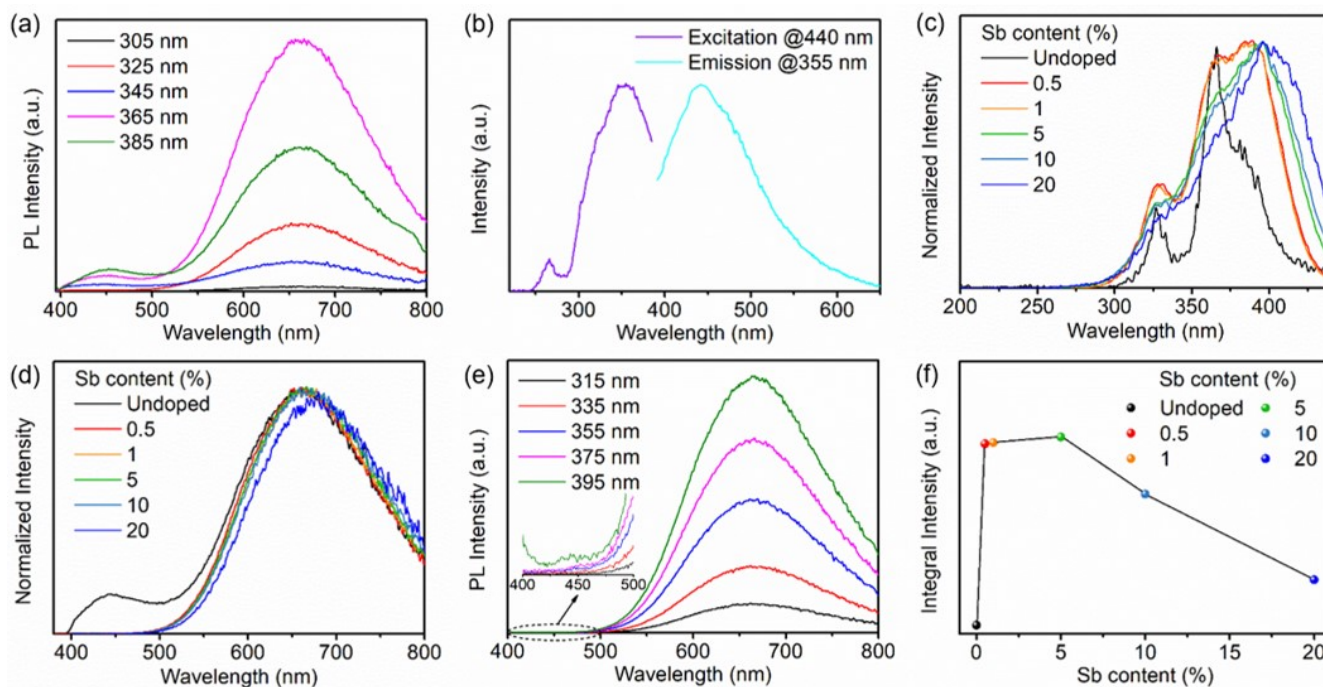

**Figure S2.** Emission spectra at different excitation wavelength of (a)  $(C_{11}H_{24}N_2)_2[InBr_6][InBr_4]$ , and (e)  $(C_{11}H_{24}N_2)_2[InBr_6][InBr_4]:5\%Sb^{3+}$ . (b) Photoluminescent spectra of 1-(crylohexylmethyl)piperazine. Normalized (c) excitation and (d) emission spectra of  $(C_{11}H_{24}N_2)_2[InBr_6][InBr_4]:xSb^{3+}$ . (f) Integral PL intensity of  $(C_{11}H_{24}N_2)_2[InBr_6][InBr_4]:xSb^{3+}$ .

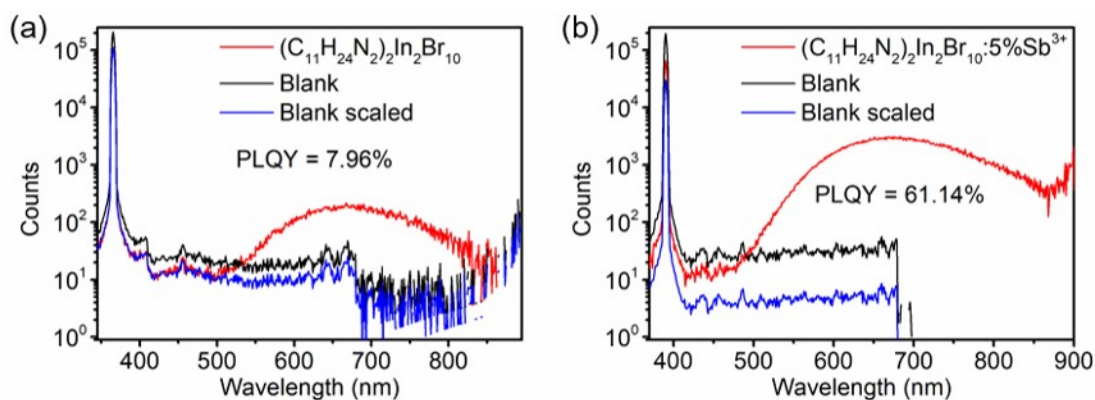

**Figure S3.** PLQY of (a)  $(C_{11}H_{24}N_2)_2[InBr_6][InBr_4]$ , and (b)  $(C_{11}H_{24}N_2)_2[InBr_6][InBr_4]:5\%Sb^{3+}$ .

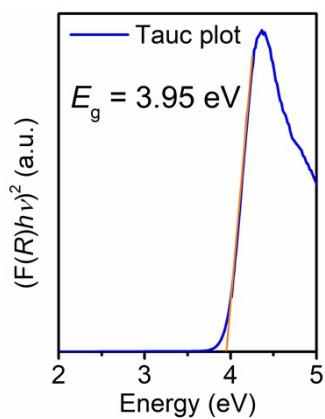

**Figure S4.** Band gap value of  $(C_{11}H_{24}N_2)_2[InBr_6][InBr_4]$  obtained from Tauc plot.<sup>1</sup>

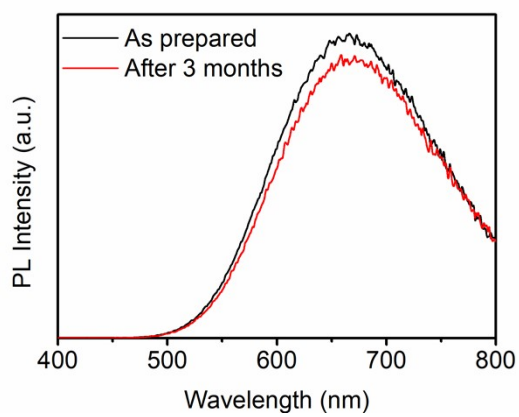

**Figure S5.** Comparison of the PL spectra of the as-prepared  $(C_{11}H_{24}N_2)_2[InBr_6][InBr_4]:5\%Sb^{3+}$  and the one exposed in the air for 3 months.

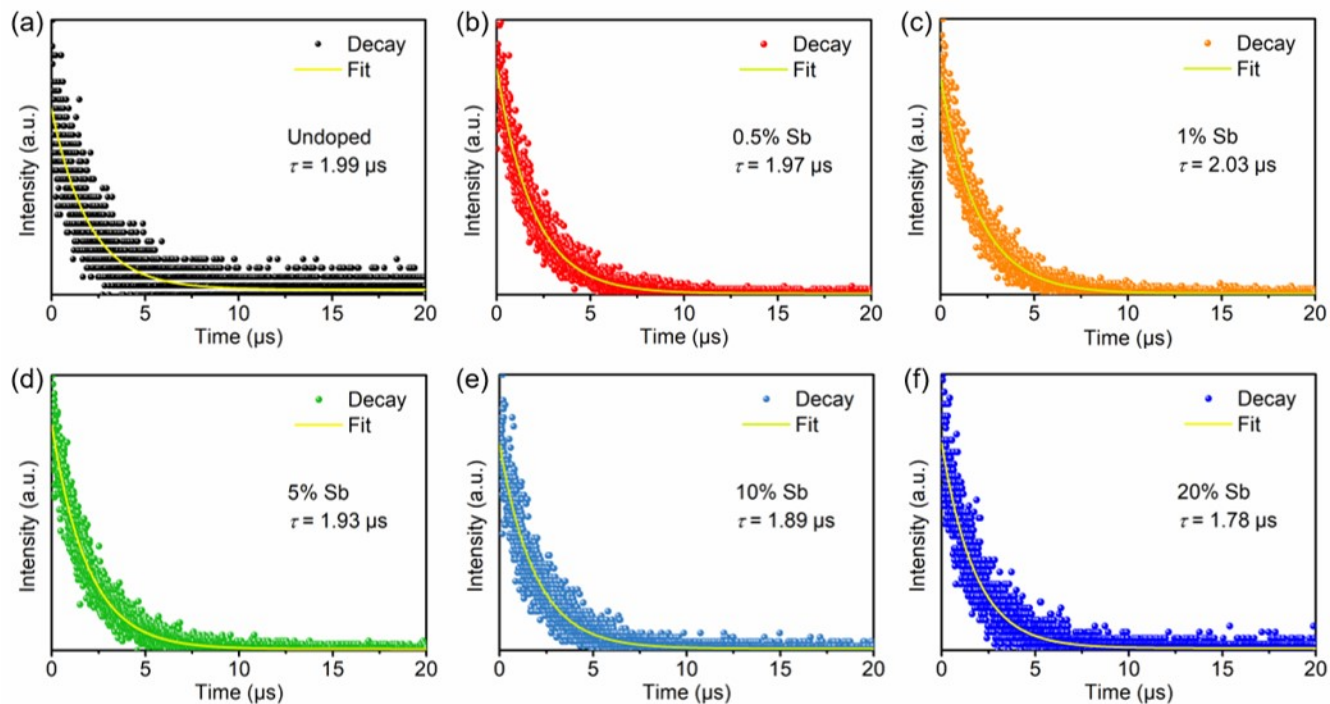

**Figure S6.** Time-resolved decay curves of  $(C_{11}H_{24}N_2)_2[InBr_6][InBr_4]:xSb^{3+}$  by single exponential fit.

(a)-(f) correspond  $x = 0, 0.005, 0.01, 0.05, 0.10, 0.20$  in turn.

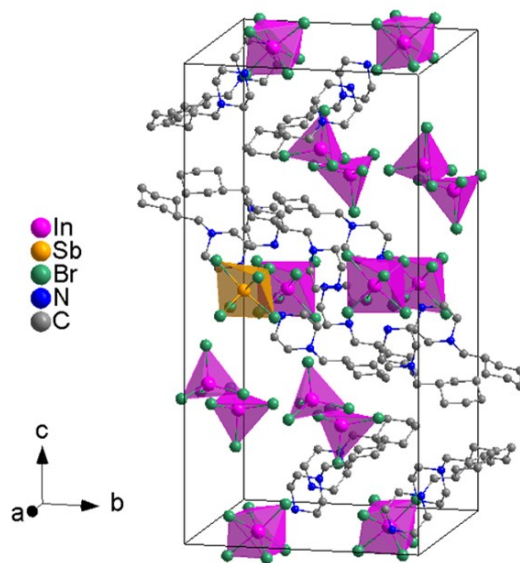

**Figure S7.** The structure model used for calculating the Sb-doped  $(C_{11}H_{24}N_2)_2[InBr_6][InBr_4]$  (H atoms are omitted for charity). One of the eight In atoms in  $[InBr_6]^{3-}$  octahedra was replaced by Sb atom, resulting in the formula  $(C_{11}H_{24}N_2)_2[In_{0.875}Sb_{0.125}Br_6][InBr_4]$ .

## Reference

- [1] J. Tauc, *Mater. Res. Bull.*, 1968, **3**, 37-46.
